# Supplementary material for: Electrokinetic properties and stability of cerium dioxide suspensions
Source: Royal Society of Chemistry journal article supplement (doi:10.1039/c6ra12725h), 2016-01-01
Supplement: c6ra12725h1.pdf [file c6ra12725h1.pdf]

## **Electrokinetical properties and stability of cerium dioxide suspensions**

S.Barany<sup>1</sup>, K.Bohacs<sup>3</sup>, I.Chepurna<sup>4,\*</sup>, R. Meszaros<sup>1</sup>

<sup>1</sup>*MTA-ME Materials Science Research Group, Institute of Chemistry, University of Miskolc, Miskolc-Egyetemvaros, 3515, Hungary*

<sup>2</sup>*The Transcarpathian II. Ferenc Rakoczi Hungarian Institute  
6 Kossuth sq., Beregovo, 90200 Ukraine*

<sup>3</sup>*Institute of Raw Materials Preparation and Environmental Processing,  
University of Miskolc, 3515, Hungary*

<sup>4</sup>*Institute for Sorption and Problems of Endoecology National Academy of Sciences  
of Ukraine, 13, General Naumov str., 03164 Kyiv, Ukraine*

**Table 1**

Porous structure of cerium dioxide

---

|                                       |      |
|---------------------------------------|------|
| Surface area, m <sup>2</sup> /g       | 15.4 |
| Total pore volume, cm <sup>3</sup> /g | 0.46 |
| Pore diameter, nm                     | 75.8 |

---

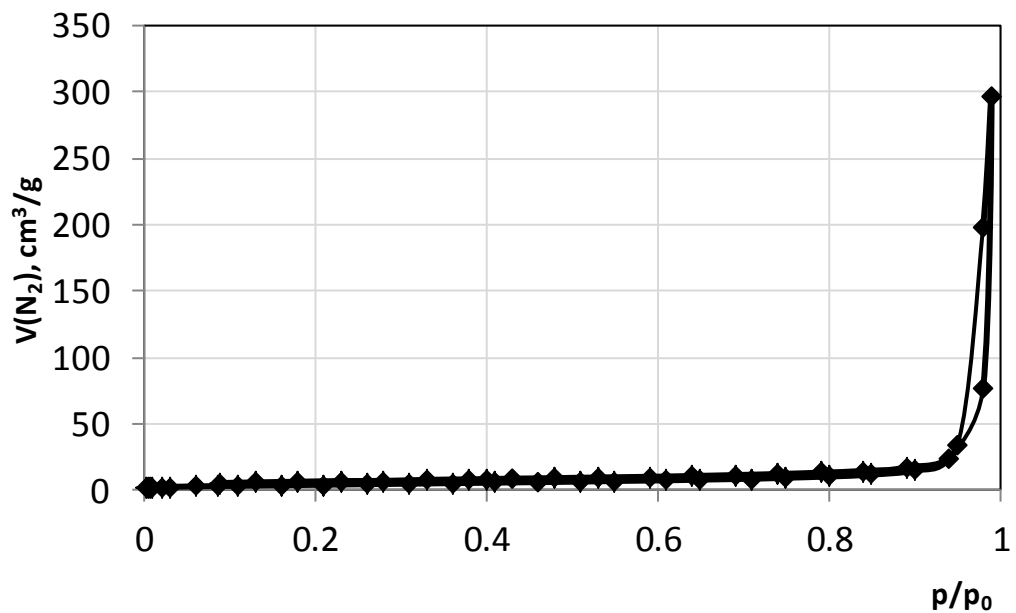

(a)

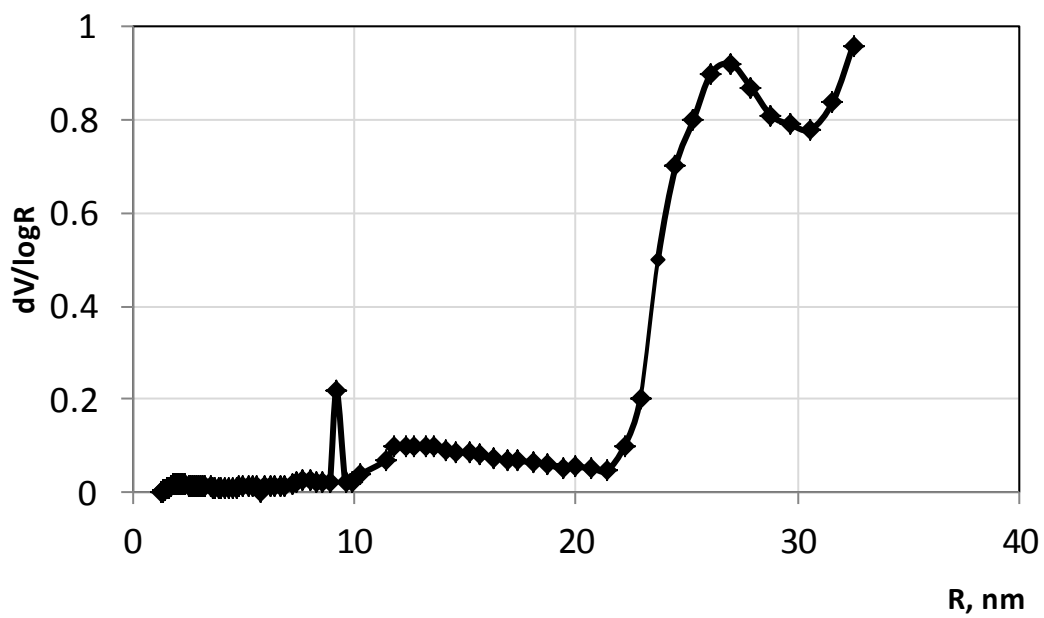

(b)

**Fig. 1**  $N_2$  adsorption-desorption isotherm (a) and pore size distribution curve (b) for cerium dioxide.

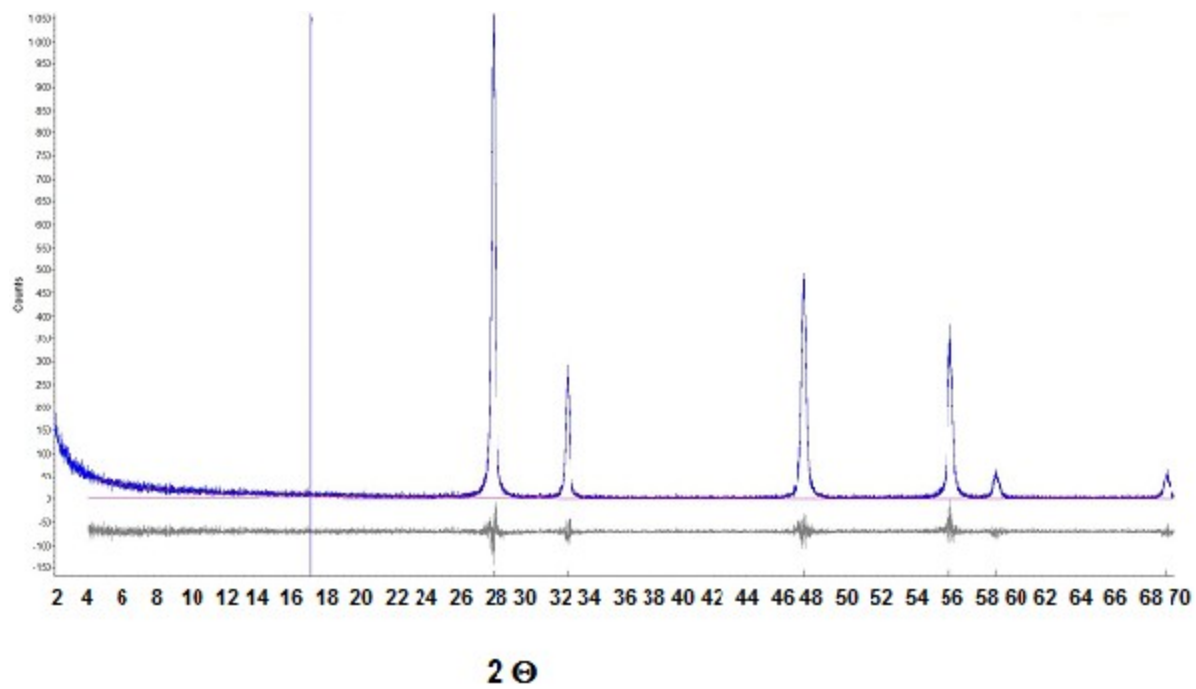

**Fig. 2** X-ray diffraction pattern for cerium dioxide powder calcined at 750 °C/ 2 h.

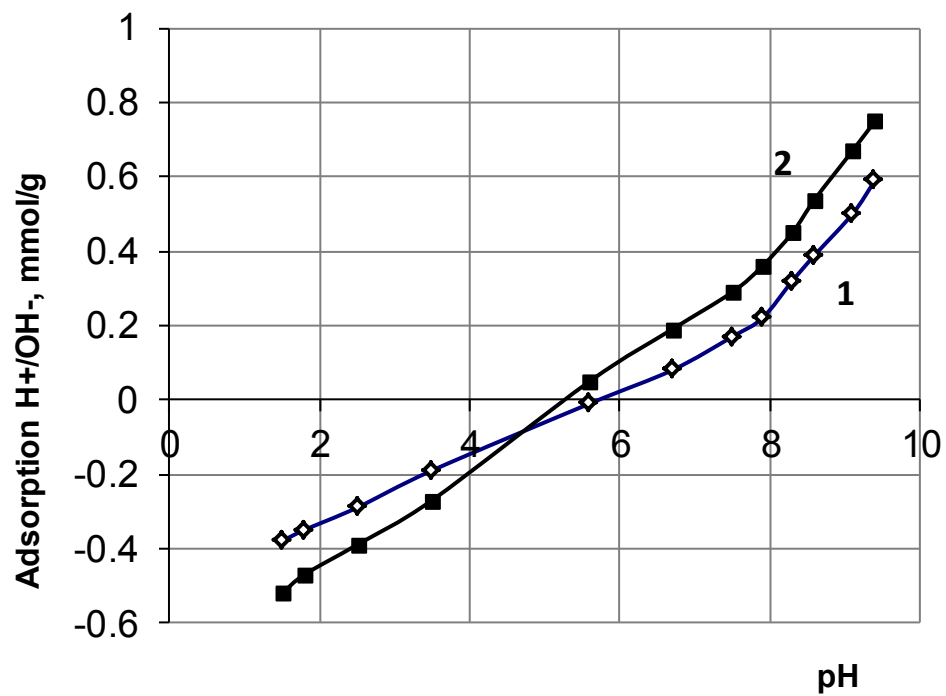

**Fig.3** Potentiometric titration curves of  $\text{CeO}_2$  suspension by HCl and KOH in DI water (curve 1) and 1 mmol KCl solution (curve 2).

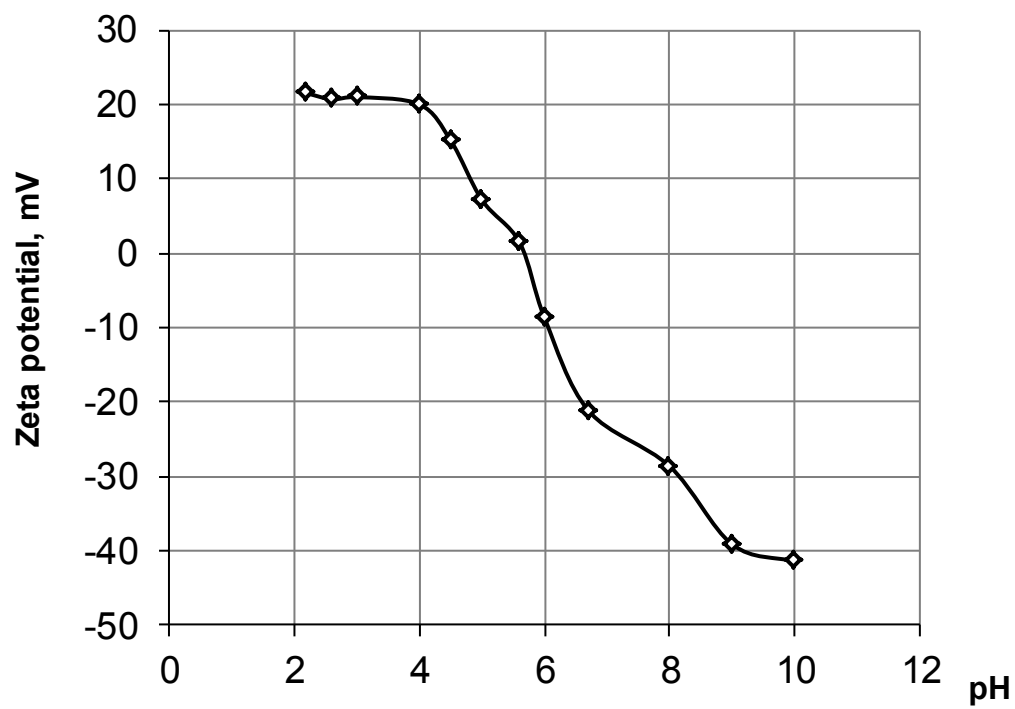

**Fig.4** Zeta-potential of CeO<sub>2</sub> suspension versus pH.

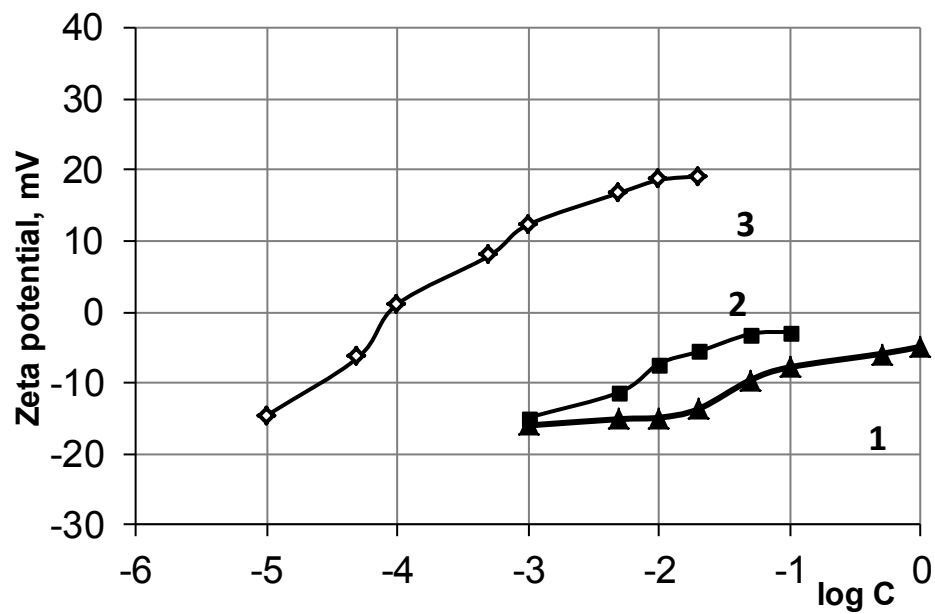

**Fig. 5** Zeta potential of CeO<sub>2</sub> suspension versus concentration of added electrolytes at pH 6.2: KCl (1), CaCl<sub>2</sub> (2) and AlCl<sub>3</sub> (3).

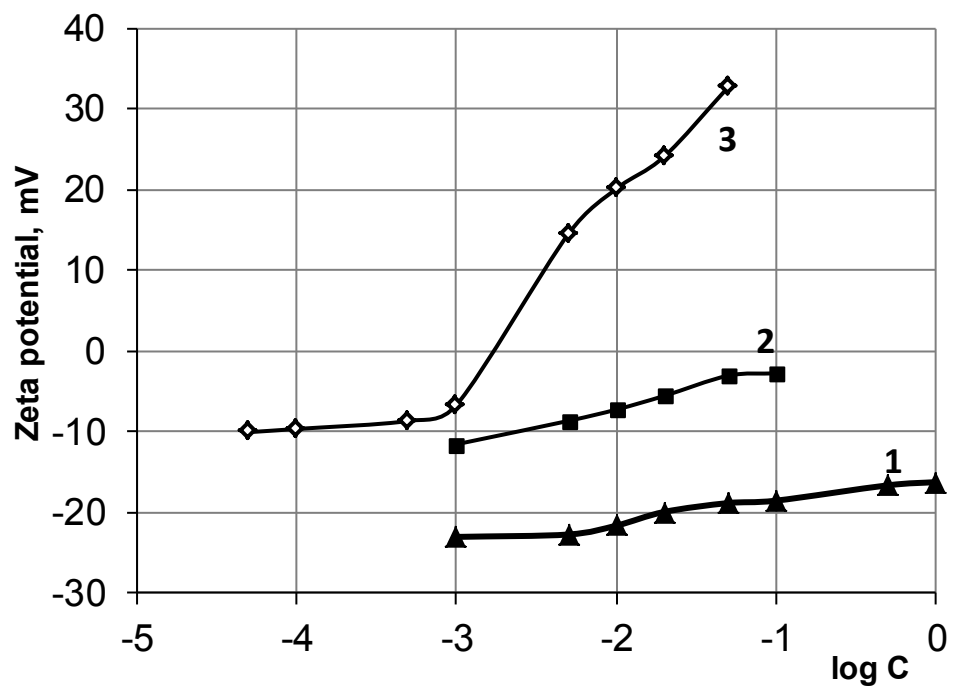

**Fig. 6** Zeta potential of  $\text{CeO}_2$  suspension versus concentration with addition of different electrolytes at pH 9.8: KCl (1),  $\text{CaCl}_2$  (2) and  $\text{LaCl}_3$  (3).



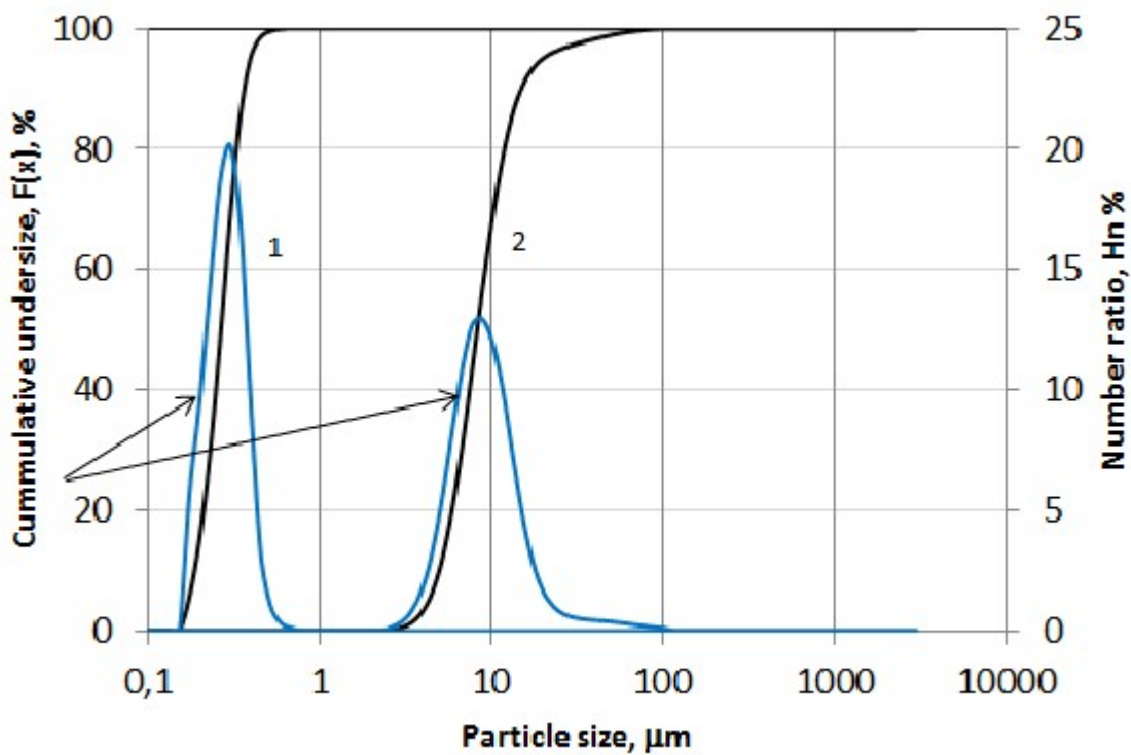

**Fig. 7** Particle size distribution of freshly prepared and aged CeO<sub>2</sub> suspensions: curve 1- immediately after 20 min of external ultrasonic treatment at 35 kHz, curve 2 - shelf life -1 week.; C(solid) = 0.1 g/L, pH = 6.2.

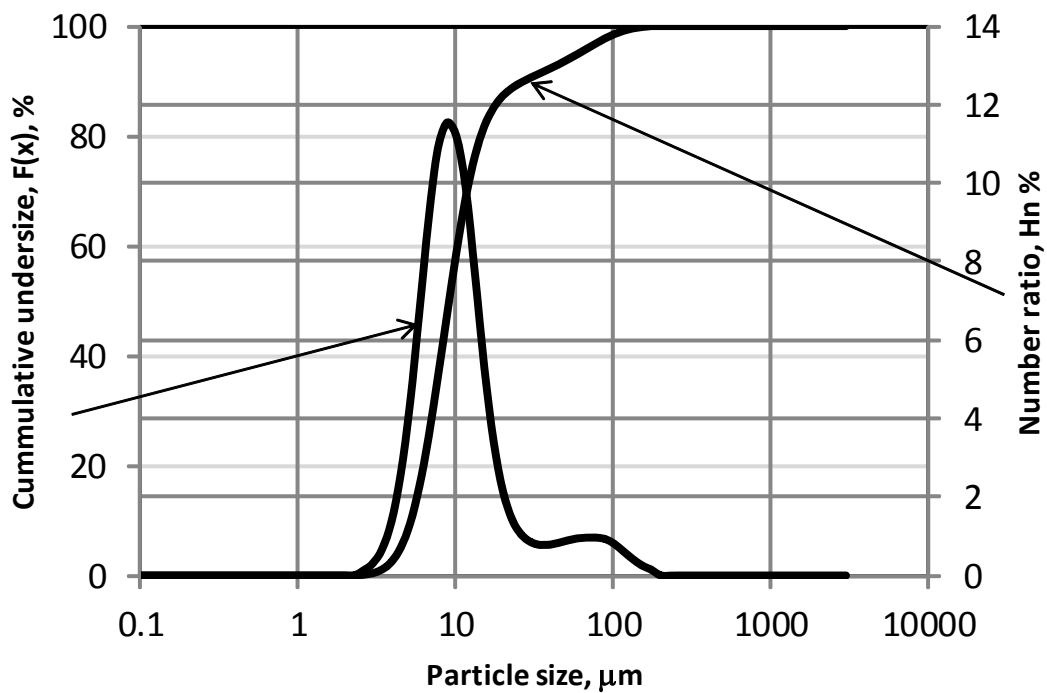

**Fig.8** Particle size distribution of aged CeO<sub>2</sub> suspension at pH 9.8 (Shelf life -1 week).

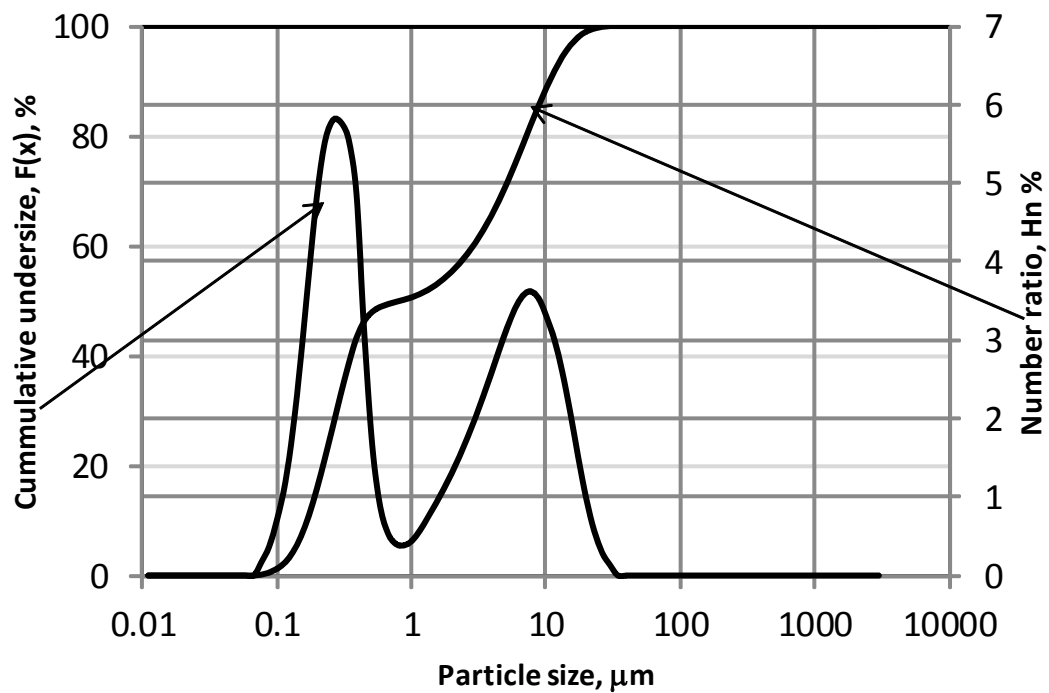

**Fig. 9** Particle size distribution of aged  $\text{CeO}_2$  nanosuspension at pH 6.2 (Shelf life - 1 week). Duration of ultrasonic treatment in the measuring unit – 3 min; frequency -22kHz.

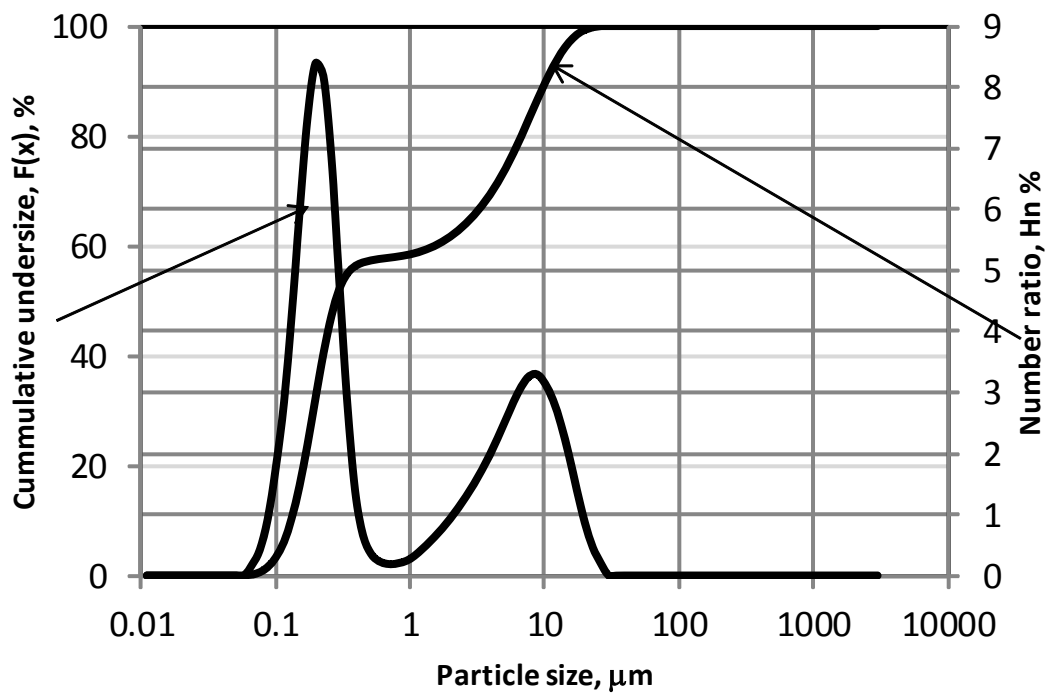

**Fig. 10** Particle size distribution of aged  $\text{CeO}_2$  nanosuspension at pH 9.8 (Shelf life -1 week). Duration of ultrasonic treatment in the measuring unit- 3 min; frequency -22kHz.

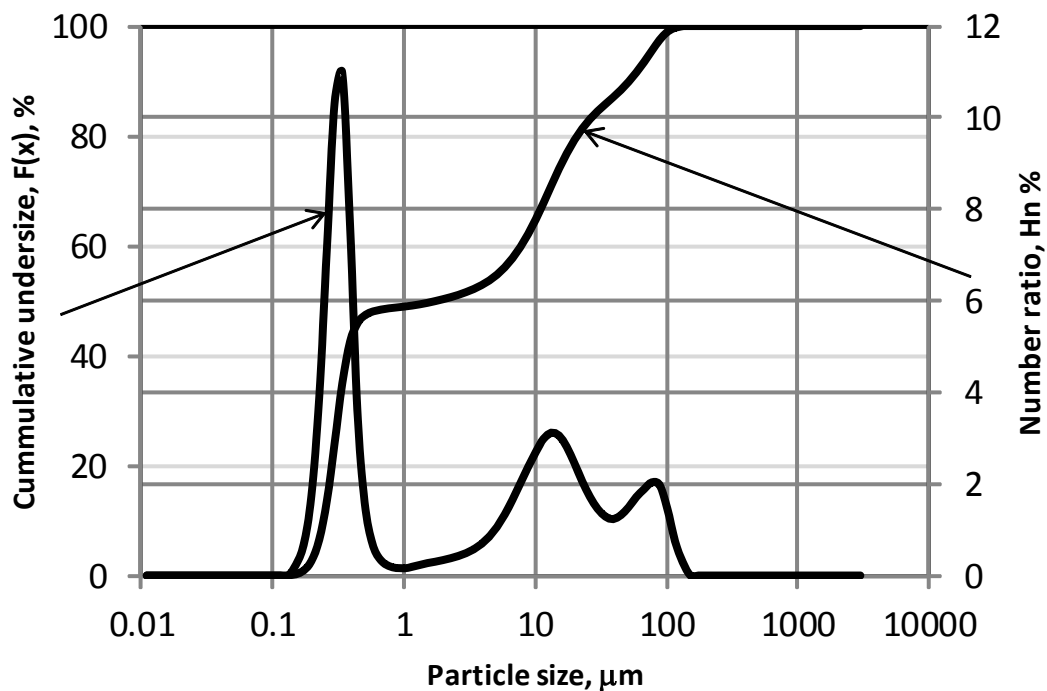

**Fig. 11** Particle size distribution of aged CeO<sub>2</sub> nanosuspension at pH 6.2 (Shelf life -1 week). Time of ultrasonic treatment in the measuring unit – 2 min; Time of subsequent stay after ultrasonic treatment -2 min (at gentle agitation in the circulating system).

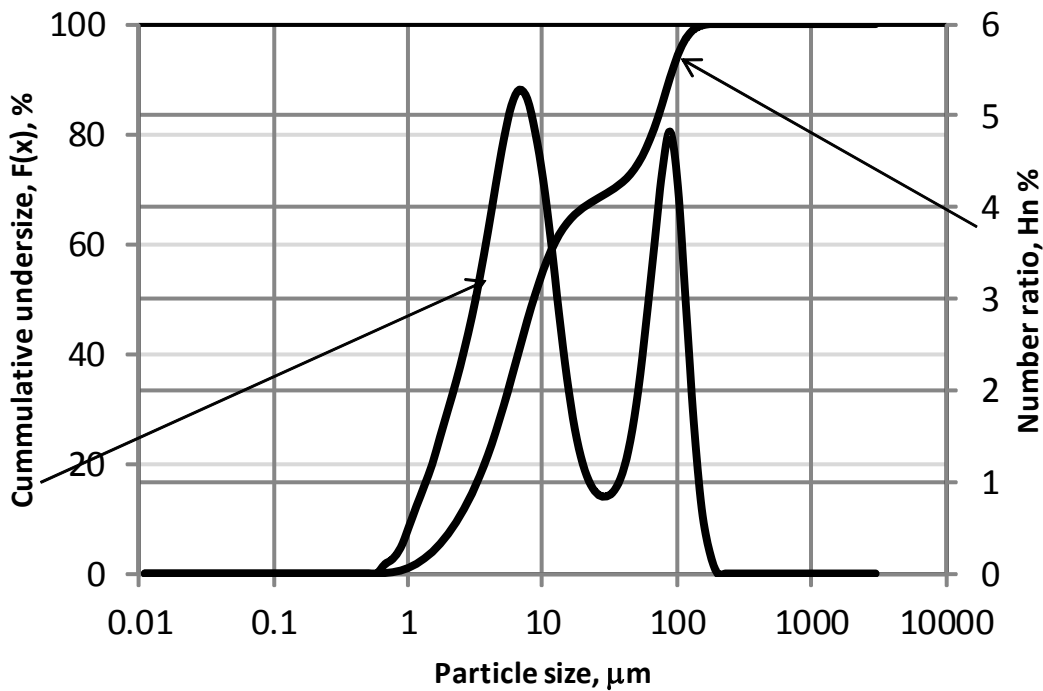

**Fig. 12** Particle size distribution of aged  $\text{CeO}_2$  suspension at pH 6.2, presence of KCl ( $C=40$  mmol/L) and gentle agitation in the circulating system.

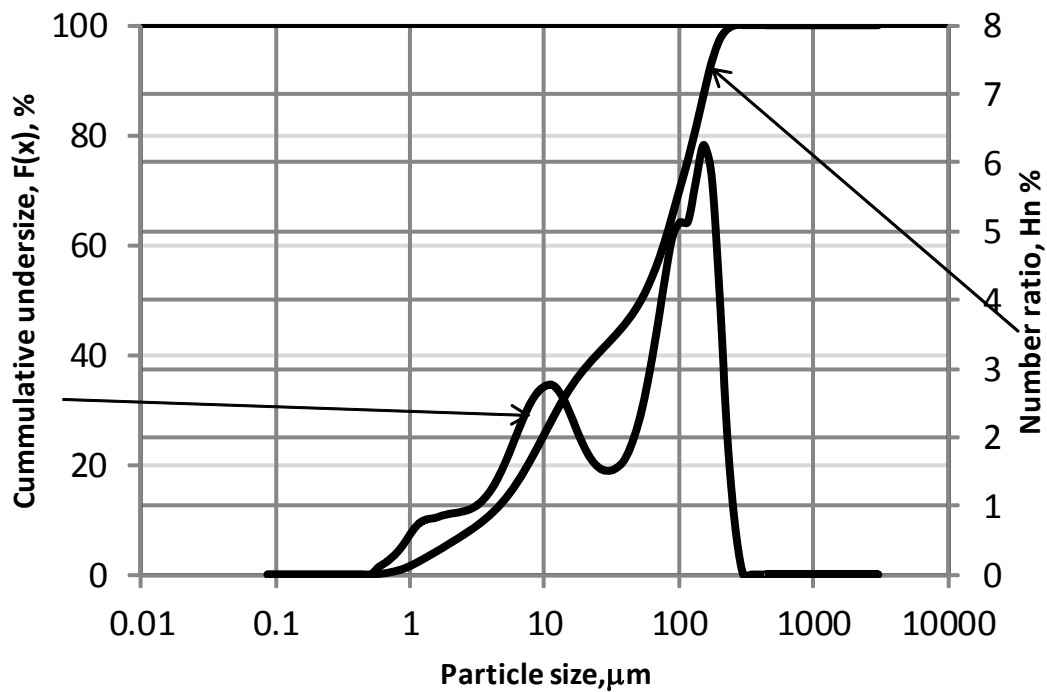

**Fig. 13** Particle size distribution of aged  $\text{CeO}_2$  suspension at pH 6.2, in the presence of  $\text{CaCl}_2$  ( $C=2.1$  mmol/L) and gentle agitation in the circulating system.
